# Supplementary material
Source: PubMed Central journal article supplement (PMC3748365)
Supplement: clpt2013103x1.pdf [file clpt2013103x1.pdf]

**Supplemental Table S1. Worldwide Allele Frequencies<sup>1</sup> of HLA-B\*15:02- Summary by Race/Ethnic Group<sup>2</sup>**

| <b>Race/Ethnic Designation</b>                                                                                                                               | <b>Allele Frequency</b> | <b>Sample Size</b> |
|--------------------------------------------------------------------------------------------------------------------------------------------------------------|-------------------------|--------------------|
| African                                                                                                                                                      | 0.0                     | 271                |
| Non-Caucasian American                                                                                                                                       | 0.0039                  | 371                |
| East Asian                                                                                                                                                   | 0.043                   | 14,397             |
| European                                                                                                                                                     | 0.000057                | 30,640             |
| Middle Eastern                                                                                                                                               | 0.0045                  | 491                |
| Oceanian                                                                                                                                                     | 0.107                   | 201                |
| South/Central Asian                                                                                                                                          | 0.0134                  | 235                |
| <sup>1</sup> Average allele frequencies are reported based on the average from the actual numbers of subjects with each allele reported in multiple studies. |                         |                    |
| <sup>2</sup> Race/ethnic group designations correspond to those indicated in Supplemental Table S2.                                                          |                         |                    |
