# Supplementary material
Source: PubMed Central journal article supplement (PMC3748365)
Supplement: clpt2013103x2.pdf [file clpt2013103x2.pdf]

**Supplemental Table S2. Worldwide Allele Frequencies of *HLA-B\*15:02*-Detailed by Sample**

| <b>HGDP-CEPH Grouping</b> | <b>Population/Ethnicity</b>                  | <b>Allele Frequency</b> | <b>Sample Size</b> |
|---------------------------|----------------------------------------------|-------------------------|--------------------|
| Africa                    | Morocco NadorMetalsa pop 2(21)               | 0                       | 73                 |
| Africa                    | Morocco SettataChaouya (22)                  | 0                       | 98                 |
| Africa                    | South Africa Natal Zulu (23)                 | 0                       | 100                |
| Americas                  | Mexico City Mestizo (24)                     | 0.008                   | 121                |
| Americas                  | Mexico Puebla Mestizo (24)                   | 0.005                   | 99                 |
| Americas                  | Mexico Sinaloa Mestizo(24)                   | 0                       | 56                 |
| Americas                  | Brazil Belo Horizonte Caucasian(23)          | 0                       | 95                 |
| East Asia                 | China Beijing pop 2 (25)                     | 0.1287                  | 826                |
| East Asia                 | China Beijing Shijiazhuang Tianjian Han (26) | 0.024                   | 618                |
| East Asia                 | China Canton Han (27)                        | 0.073                   | 264                |
| East Asia                 | China Guangdong Province (28)                | 0.035                   | 100                |
| East Asia                 | China Guangxi Region Maonan (29)             | 0.148                   | 108                |
| East Asia                 | China Guizhou Province Bouyei (30)           | 0.155                   | 109                |
| East Asia                 | China Guizhou Province Miao pop 2 (30)       | 0.042                   | 85                 |
| East Asia                 | China Guizhou Province Shui (30)             | 0.156                   | 153                |
| East Asia                 | China Inner Mongolia Region (31)             | 0.015                   | 102                |
| East Asia                 | China North Han (32)                         | 0.019                   | 105                |
| East Asia                 | China Qinghai Province Hui (31)              | 0.027                   | 110                |
| East Asia                 | China Southwest Dai (25)                     | 0.069                   | 124                |
| East Asia                 | China Yunnan Province Bulang(33)             | 0.358                   | 116                |
| East Asia                 | China Yunnan Province Han (34)               | 0.124                   | 101                |
| East Asia                 | China Yunnan Province Hani pop 2 (33)        | 0.1                     | 150                |
| East Asia                 | China Yunnan Province Jinuo (35)             | 0.238                   | 109                |

|                    |                                      |        |        |
|--------------------|--------------------------------------|--------|--------|
| East Asia          | China Yunnan Province Lisu (36)      | 0.123  | 111    |
| East Asia          | China Yunnan Province Nu (36)        | 0.09   | 107    |
| East Asia          | China Yunnan Province Wa (35)        | 0.21   | 119    |
| East Asia          | Japan Central (37)                   | 0.001  | 371    |
| East Asia          | Japan pop 3 (38)                     | 0.001  | 1,018  |
| East Asia          | Malaysia(39)                         | 0.081  | 75     |
| East Asia          | Singapore Chinese (8, 23)            | 0.057  | 149    |
| East Asia          | South Korea pop 3 (40)               | 0.002  | 485    |
| East Asia          | South Korea pop 8 (41)               | 0.022  | 7,096  |
| East Asia          | Taiwan pop 2 (42)                    | 0.052  | 364    |
| East Asia          | Taiwan pop 3 (43)                    | 0.06   | 212    |
| East Asia          | Taiwan Tzu Chi Cord Blood Bank (44)  | 0.042  | 710    |
| East Asia          | Thailand Northeast pop 2(45)         | 0.084  | 400    |
| Europe             | Cuba Caucasians(8, 23)               | 0      | 70     |
| Europe             | Bulgaria (46)                        | 0      | 55     |
| Europe             | Germany pop 6 (47)                   | 0.0002 | 8,862  |
| Europe             | Ireland Northern (48, 49)            | 0      | 1,000  |
| Europe             | Poland DKMS(50)                      | 0      | 20,653 |
| Middle East        | United Arab Emirates pop 2(51)       | 0.006  | 373    |
| Middle East        | Oman (8, 23)                         | 0      | 118    |
| Oceania            | Indonesia Sundanese and Javanese(52) | 0.107  | 201    |
| South/Central Asia | India Mumbai Marathas(53)            | 0.01   | 72     |
| South/Central Asia | India Mumbai Maratha (53)            | 0.019  | 91     |
| South/Central Asia | India North pop 2 (54)               | 0.01   | 72     |
