# Supplementary material
Source: PubMed Central journal article supplement (PMC3748365)
Supplement: clpt2013103x4.pdf [file clpt2013103x4.pdf]

HLA-B Reference ATGCTGGTCATGGCGCCCCGAACCGTCTCCTGCTGCTCTCGGCGGCCCTGGCCCTGACCGAGACCTGGGCGGGCTCCCACTCCATGAGGTATTTCTACA  
HLA-B\*1502 ATGC**GGGTCA**CGGCGCCCCGAACCGTCTCCTGCTGCTCTCGG**GAG**CCCTGGCCCTGACCGAGACCTGGGCGGGCTCCCACTCCATGAGGTATTTCTACA

HLA-B Reference CCTCCGTGTCCCGGCCCGGCCGCGGGGAGCCCCGCTTCATCTCAGTGGGCTACGTGGACGACACCCAGTTTCGTGAGGTTTCGACAGCGACGCCGCGAGTCC  
HLA-B\*1502 CC**GCC**ATGTCCCGGCCCGGCCGCGGGGAGCCCCGCTTCATC**G**CAGTGGGCTACGTGGACGACACCCAGTTTCGTGAGGTTTCGACAGCGACGCCGCGAGTCC

HLA-B Reference GAGAGAGGAGCCGCGGGCGCCGTGGATAGAGCAGGAGGGGCGGAGTATTGGGACCGGAACACACAGATCTACAAGGCCAGGCACAGACTGACCGAGAG  
HLA-B\*1502 GAG**GAT**GG**CGCC**CCGGGCGCC**A**TGGATAGAGCAGGAGGGGCGGAGTATTGGGACCGGAACACACAGATCT**CCAAGACCACA**CACAGACT**T**ACCGAGAG

HLA-B Reference AGCCTGCGGAACCTGCGCGGCTACTACAACCAGAGCGAGGCCGGGTCTCACACCCTCCAGAGCATGTACGGCTGCGACGTGGGGCCGGACGGGCGCCTCC  
HLA-B\*1502 AGCCTGCGGAACCTGCGCGGCTACTACAACCAGAGCGAGGCCGGGTCTCACAT**TC**ATCCAGAG**GAT**GTAT**T**GGCTGCGACGTGGGGCCGGACGGGCGCCTCC

HLA-B Reference TCCGCGGGCATGACCAGTACGCCTACGACGGCAAGGATTACATCGCCCTGAACGAGGACCTGCGCTCCTGGACCGCCGCGGACACGGCGGCTCAGATCAC  
HLA-B\*1502 TCCGCGGG**T**ATGACCAGT**CC**GCCTACGACGGCAAGGATTACATCGCCCTGAACGAGGACCT**G**AGCTCCTGGACCGC**GG**CGGACACGGCGGCTCAGATCAC

HLA-B Reference CCAGCGCAAGTGGGAGGCGGCCCGTGAGGCGGAGCAGCGGAGAGCCTACCTGGAGGGCGAGTGCCTGGAGTGGCTCCGCAGATACCTGGAGAACGGGAAG  
HLA-B\*1502 CCAGCGCAAGTGGGAGGCGGCCCGTGAGGCGGAGCAGC**T**GAGAGCCTACCTGGAGGGC**CT**TGCTGCCTGGAGTGGCTCCGCAGATACCTGGAGAACGGGAAG

HLA-B Reference GACAAGCTGGAGCGCGCTGACCCCCCAAAGACACACGTGACCCACCACCCCATCTCTGACCATGAGGCCACCCTGAGGTGCTGGGCCCTGGGTTTCTACC  
HLA-B\*1502 GAG**AC**CGCT**G**CAGCGCG**G**GACCCCCCAAAGACACAT**T**GTGACCCACCACCCCATCTCTGACCATGAGGCCACCCTGAGGTGCTGGGCCCTGGG**CT**TCTACC

HLA-B Reference CTGCGGAGATCACACTGACCTGGCAGCGGGATGGCGAGGACCAAACCTCAGGACACTGAGCTTGTGGAGACCAGACCAGCAGGAGATAGAACCTTCCAGAA  
HLA-B\*1502 CTGCGGAGATCACACTGACCTGGCAGCGGGATGGCGAGGACCAAACCTCAGGACAC**C**GAGCTTGTGGAGACCAGACCAGCAGGAGATAGAACCTTCCAGAA

HLA-B Reference GTGGGCAGCTGTGGTGGTGCCTTCTGGAGAAGAGCAGAGATACACATGCCATGTACAGCATGAGGGGCTGCCGAAGCCCCTCACCTGAGATGGGAGCCG  
HLA-B\*1502 GTGGGCAGCTGTGGTGGTGCCTTCTGGAGAAGAGCAGAGATACACATGCCATGTACAGCATGAGGGGCTGCCGAAGCCCCTCACCTGAGATGGGAGCC**A**

HLA-B Reference TCTTCCCAGTCCACCGTCCCCATCGTGGGCATTGTTGCTGGCCTGGCTGTCTTAGCAGTTGTGGTCATCGGAGCTGTGGTCGCTGCTGTGATGTGTAGGA  
HLA-B\*1502 TCTTCCCAGTCCACC**A**TCCCCATCGTGGGCATTGTTGCTGGCCTGGCTGTCTTAGCAGTTGTGGTCATCGGAGCTGTGGTCGCT**A**CTGTGATGTGTAGGA

HLA-B Reference GGAAGAGTTTCAGGTGGAAAAGGAGGGAGCTACTCTCAGGCTGCGTGACGACAGTGGCCAGGGCTCTGATGTGTCTCTCACAGCTTGA  
HLA-B\*1502 GGAAGAG**C**TCAGGTGGAAAAGGAGGGAGCTACTCTCAGGCTGCGT**C**CAGCGACAGTGGCCAGGGCTCTGATGTGTCTCTCACAGCTTGA

**Supplemental Figure S1. Nucleotide coding sequence alignment of HLA-B\*15:02 and the reference sequence.** Nucleotide differences between the two sequences are highlighted in blue. This alignment was generated using the IMGT/HLA Database's alignment tool ([www.ebi.ac.uk/imgt/hla/align.html](http://www.ebi.ac.uk/imgt/hla/align.html)) and visualized in Jalview.(78)
