# Supplementary material
Source: PubMed Central journal article supplement (PMC3748365)
Supplement: clpt2013103x6.pdf [file clpt2013103x6.pdf]

## Supplemental Material

### Clinical Pharmacogenetics Implementation Consortium (CPIC) Guidelines for *HLA-B* Genotype and Carbamazepine Dosing

Susan G. Leckband<sup>1,2</sup>, John R. Kelsoe<sup>1,2</sup>, H. Mark Dunnenberger<sup>3</sup>, Alfred L. George, Jr.<sup>4</sup>, Eric Tran<sup>1</sup>, Reisel Berger<sup>1</sup>, Daniel J. Müller<sup>5,6</sup>, Michelle Whirl-Carrillo<sup>7</sup>, Kelly Caudle<sup>8</sup>, Munir Pirmohamed<sup>9</sup>

<sup>1</sup>Veterans Affairs San Diego Healthcare System, San Diego, California

<sup>2</sup>Department of Psychiatry, University of California, San Diego, San Diego, California

<sup>3</sup>University of Tennessee College of Pharmacy, Memphis, Tennessee

<sup>4</sup>Division of Genetic Medicine, Vanderbilt University, Nashville, Tennessee

<sup>5</sup>Centre for Addiction and Mental Health, Toronto, Canada

<sup>6</sup>Department of Psychiatry, University of Toronto, Canada

<sup>7</sup>Department of Genetics, Stanford University, Palo Alto, California

<sup>8</sup>Department of Pharmaceutical Sciences, St. Jude Children's Research Hospital, Memphis, TN

<sup>9</sup>Department of Pharmacology, University of Liverpool, Liverpool, United Kingdom



## Table of Contents

|                                                                                                             |    |
|-------------------------------------------------------------------------------------------------------------|----|
| CPIC Updates.....                                                                                           | 4  |
| Focused Literature Review .....                                                                             | 4  |
| Other Considerations .....                                                                                  | 5  |
| HLA-A*31:01 .....                                                                                           | 5  |
| Other Antiepileptics With An Aromatic Ring .....                                                            | 6  |
| Available Genetic Test Options and Interpretation .....                                                     | 7  |
| Levels of Evidence.....                                                                                     | 8  |
| Supplemental Table S1. Worldwide Allele Frequencies of HLA-B*15:02 - Summary by Race/Ethnic Group.....      | 10 |
| Supplemental Table S2. Worldwide Allele Frequencies of <i>HLA-B*15:02</i> - Detailed by Sample .....        | 11 |
| Supplemental Table S3. Evidence linking <i>HLA-B*15:02</i> genotype with carbamazepine-induced SJS/TEN..... | 13 |
| Supplemental Figure S1. Nucleotide coding sequence alignment of HLA-B*15:02 and the reference sequence..... | 17 |
| Supplemental Figure S2. Amino acid sequence alignment of HLA-B*15:02 and the reference sequence.....        | 18 |
| References.....                                                                                             | 19 |

## CPIC Updates

Clinical Pharmacogenetics Implementation Consortium (CPIC) guidelines are published in their entirety on the PharmGKB website ([www.pharmgkb.org](http://www.pharmgkb.org)). These guidelines will be updated periodically based on new literature and published online.

## Focused Literature Review

A search was conducted on the PubMed database (1966 to December 2012) and the Ovid MEDLINE (1950 to December 2012) database for keywords ([HLA or HLA-B or *HLA-B\*15:02*] AND [carbamazepine]). A more general search was also conducted using the search terms ([carbamazepine hypersensitivity] OR [carbamazepine Stevens-Johnson]).

A table of frequencies of the *HLA-B\*15:02* allele in different ethnic populations around the world was assembled from several sources. Frequencies were included from the Allele Frequencies in Worldwide Populations website (<http://www.allelefreqencies.net/>) which lists frequency data for *HLA-B\*15:02* from 100 different samples and populations. Where possible, the original paper from which the allele frequencies were obtained was reviewed for the inclusion criteria listed below. Allele frequencies were also obtained by conducting a search of the PubMed database (1966 to June 2012) and Ovid MEDLINE (1950 to June 2012) using the following criteria: ([HLA or HLA-B or *HLA-B\*15:02*] AND [genotype or allele or frequency]) with filter limits set to retrieve "full-text" and "English" literature. Studies from both sources were considered for inclusion if, 1) the ethnicity of the population was clearly indicated; 2) either allele frequencies or alleles for *HLA-B* genotypes were reported; 3) the method by which *HLA-B* was genotyped was reliable and proven; 4) the sample population consisted of at least 50 individuals; 5) the study represented publication of novel data, not literature reviews or meta-analyses of previously published data; and 6) the population studied did not have a concomitant disease (such as an autoimmune condition) that would be expected to result in a distribution of *HLA-B* alleles that were different from the general population. In instances where genotype data from large cohorts of ethnically-diverse individuals were reported without respect to ethnicity, studies were only considered if one ethnicity was  $\geq 95\%$  of the majority. In some cases, sample

sizes or allele frequencies were updated to reflect only subjects successfully genotyped for *HLA-B* (rather than the total sample size of the study) or to correct errata in the original publication. The combined analysis included 271 Africans, 371 non-Caucasian Americans, 14,397 East Asians, 30,640 Europeans including Caucasians worldwide, 491 Middle Easterners, 201 Oceanians, and 235 South or Central Asians (Supplemental Tables S1 and S2).

## **Other Considerations**

### ***HLA-A\*31:01***

*HLA-A\*31:01* has also been associated with carbamazepine hypersensitivity reactions (1, 2). This includes not only SJS and TEN (3, 4), but also other phenotypes including maculopapular exanthema (MPE) and DRESS (drug reactions with eosinophilia and systemic symptoms). Thus, unlike *HLA-B\*15:02* where the association is specific for SJS/TEN, *HLA-A\*31:01* is associated a wider range of phenotypes. The association with *HLA-A\*31:01* has also been shown in a larger number of ethnicities including Han Chinese, Japanese, South Korean and Caucasian (5-7), and in two independently replicated Genome-wide Association studies (GWAS) in Japanese and Caucasian populations (7, 8). The OR for the *HLA-A\*31:01* association was approximately 9, whereas for *HLA-B\*15:02* it is approximately 113(2).

Yip et al. have systematically reviewed both alleles and discussed the clinical utility for evaluating *HLA-A\*31:01* as compared to *HLA-B\*15:02*. They found that, in order to avoid one case of carbamazepine-induced cutaneous adverse drug reaction, the number of patients required for *HLA-A\*31:01* screening is smaller than that required for *HLA-B\*15:02*. However, if just SJS/TEN is considered, then the numbers are in favor of *HLA-B\*15:02* screening.

It is unclear why the severity of the cutaneous adverse drug reactions associated with the two alleles differ (2). It is also unclear why the *HLA-A\*31:01* association is found in more populations than the *HLA-B\*15:02* association. It may be related to the fact that the background frequency of the *HLA-A\*31:01* allele is higher than the *HLA-B\*15:02* allele in many populations. The frequency of *HLA-B\*15:02* is extremely low in the Japanese, Korean and European populations, ranging from (0.002 – 0.02) (2).

### ***Other Antiepileptics With An Aromatic Ring***

Several drugs structurally and therapeutically similar to carbamazepine have also been associated with drug-induced adverse cutaneous reactions and *HLA-B\*15:02*.

***Phenytoin*** and fosphenytoin, the parenteral prodrug of phenytoin, are FDA approved for the treatment of tonic-clonic seizures, partial seizures, status epilepticus and for seizure prevention. Positive *HLA-B\*15:02* has been reported to occur less frequently in phenytoin/fosphenytoin-induced Stevens-Johnson Syndrome (SJS) / toxic epidermal necrolysis (TEN) than in carbamazepine-induced SJS/TEN though this is supported currently by only limited data (9-11).

***Oxcarbazepine*** is the keto-analog of carbamazepine. As with carbamazepine, oxcarbazepine has been used in the treatment of partial seizures with and without generalization and in the treatment of neuropathic pain. As of this report, three cases have been reported of oxcarbazepine-induced SJS in individuals positive for *HLA-B\*15:02* (12-14). There is also one case report tying oxcarbazepine to MPE without progression to SJS/TEN in a patient of Han Chinese descent (15).

***Eslicarbazepine acetate*** is an antiepileptic drug used in Europe and America. It is a prodrug which is activated to eslicarbazepine, an active metabolite of oxcarbazepine. As of this report, there have been no cases reported of eslicarbazepine-induced SJS/TEN; however, based on its structural similarity to oxcarbazepine, caution should be used in susceptible individuals positive for *HLA-B\*15:02*.

***Lamotrigine*** has been associated with SJS/TEN, particularly with rapid dose escalation or when used in combination with valproic acid. There are conflicting reports regarding its association with *HLA-B\*15:02*. In one study of three lamotrigine-induced SJS in a Han Chinese population, none were associated with *HLA-B\*15:02* (16), but in a separate study in the same population, two of the six lamotrigine-induced SJS were positive for *HLA-B\*15:02* (17).

## Available Genetic Test Options and Interpretation

Commercially available genetic testing options change over time. Information that may assist in evaluating options is available below, as well as on the Pharmacogenetic Tests section ([http://pharmgkb.org/resources/forScientificUsers/pharmacogenomic\\_tests.jsp](http://pharmgkb.org/resources/forScientificUsers/pharmacogenomic_tests.jsp)) of PharmGKB. Furthermore, the Genetic Testing Registry (GTR) provides a central location for voluntary submission of genetic test information by providers and is available at <http://www.ncbi.nlm.nih.gov/gtr/>. At the time of this publication, no genetic test information has been submitted to the GTR regarding HLA-B\*15:02.

The *HLA-B\*15:02* allele is a complex variant consisting of numerous nucleotide and resultant amino acid substitutions. Comparison of nucleotide sequences for a reference *HLA-B* allele with that of *HLA-B\*15:02* reveals 42 differences within the open reading frame of the gene (Figure S1). These nucleotide sequence differences translate to a peptide exhibiting 27 amino acid substitutions in the variant allele (Figure S2).

A variety of companies provide clinical testing services for the detecting of *HLA-B\*15:02*. They primarily employ two different detection methods. One is direct sequencing of the gene. Alleles are assigned by comparison of the sequence to the known variants that define *HLA-B\*15:02* as detailed in Figure S1 and reported as the diplotype of both *HLA-B* alleles.

Genotyping is another common approach in which the sequence variants that define *HLA-B\*15:02* are directly detected through a panel of DNA tests. Allele specific polymerase chain reaction (PCR) is commonly employed where PCR primers specific for each nucleotide variant are used. The PCR products can then be detected using gel electrophoresis or other methods. A variety of other genotyping methods may also be used to directly detect each of the nucleotide variants for *HLA-B\*15:02*. As the test is specific for *HLA-B\*15:02*, the test will only report its presence and absence as opposed to the full diplotype available through sequencing.

Another option is the genotyping of one or more single nucleotide polymorphisms (SNPs) that are near the HLA-B locus and in linkage disequilibrium with the *HLA-B\*15:02* allele. However, as this test is indirect and depends upon linkage disequilibrium which may vary between

different populations, it may have lower accuracy. It also requires genotyping and may not be any faster or less expensive than genotyping of the specific defining variants.

## Levels of Evidence

Supplemental Table S3 summarizes the evidence for association of SJS/TEN to *HLA-B\*15:02*. The evidence is graded on a scale of high, moderate, and weak, modified slightly from Valdes et al. (18):

**High:** Consistent results from well-designed, well-conducted studies.

**Moderate:** Sufficient to determine effects, but limited by the number, quality, or consistency of the individual studies; generalizability to routine practice; or indirect nature of the evidence.

**Weak:** Insufficient to draw meaningful conclusions regarding health outcomes because of limited number or power of studies, important flaws in study design or execution, gaps in the chain of evidence, or lack of information.

CPIC's dosing recommendations are based on weighing the evidence from a combination of preclinical functional and clinical data, as well as on some existing disease-specific consensus guidelines.(19) Some of the factors that are taken into account include *in vitro* studies of carbamazepine-stimulated T cells from patients with *HLA-B\*15:02* alleles, and retrospective and prospective clinical outcome data for carbamazepine.

Overall, the dosing recommendations are simplified to allow rapid interpretation by clinicians. We chose to use a slight modification of a transparent and simple system for just three categories for recommendations adopted from the rating scale for evidence-based recommendations on the use of retroviral agents (<http://aidsinfo.nih.gov/contentfiles/AdultandAdolescentGL.pdf>)(20): strong, where “the evidence is high quality and the desirable effects clearly outweigh the undesirable effects”; moderate, in which “there is a close or uncertain balance” as to whether the evidence is high quality and the desirable clearly outweigh the undesirable effects; and optional, in which the desirable effects are closely balanced with undesirable effects and there is room for differences in opinion as to the need for the recommended course of action.



Strong recommendation for the statement

Moderate recommendation for the statement

Optional recommendation for the statement

**Supplemental Table S1. Worldwide Allele Frequencies<sup>1</sup> of HLA-B\*15:02- Summary by Race/Ethnic Group<sup>2</sup>**

| <b>Race/Ethnic Designation</b>                                                                                                                               | <b>Allele Frequency</b> | <b>Sample Size</b> |
|--------------------------------------------------------------------------------------------------------------------------------------------------------------|-------------------------|--------------------|
| African                                                                                                                                                      | 0.0                     | 271                |
| Non-Caucasian American                                                                                                                                       | 0.0039                  | 371                |
| East Asian                                                                                                                                                   | 0.043                   | 14,397             |
| European                                                                                                                                                     | 0.000057                | 30,640             |
| Middle Eastern                                                                                                                                               | 0.0045                  | 491                |
| Oceanian                                                                                                                                                     | 0.107                   | 201                |
| South/Central Asian                                                                                                                                          | 0.0134                  | 235                |
| <sup>1</sup> Average allele frequencies are reported based on the average from the actual numbers of subjects with each allele reported in multiple studies. |                         |                    |
| <sup>2</sup> Race/ethnic group designations correspond to those indicated in Supplemental Table S2.                                                          |                         |                    |

**Supplemental Table S2. Worldwide Allele Frequencies of *HLA-B\*15:02*-Detailed by Sample**

| <b>HGDP-CEPH Grouping</b> | <b>Population/Ethnicity</b>                  | <b>Allele Frequency</b> | <b>Sample Size</b> |
|---------------------------|----------------------------------------------|-------------------------|--------------------|
| Africa                    | Morocco NadorMetalsa pop 2(21)               | 0                       | 73                 |
| Africa                    | Morocco SettataChaouya (22)                  | 0                       | 98                 |
| Africa                    | South Africa Natal Zulu (23)                 | 0                       | 100                |
| Americas                  | Mexico City Mestizo (24)                     | 0.008                   | 121                |
| Americas                  | Mexico Puebla Mestizo (24)                   | 0.005                   | 99                 |
| Americas                  | Mexico Sinaloa Mestizo(24)                   | 0                       | 56                 |
| Americas                  | Brazil Belo Horizonte Caucasian(23)          | 0                       | 95                 |
| East Asia                 | China Beijing pop 2 (25)                     | 0.1287                  | 826                |
| East Asia                 | China Beijing Shijiazhuang Tianjian Han (26) | 0.024                   | 618                |
| East Asia                 | China Canton Han (27)                        | 0.073                   | 264                |
| East Asia                 | China Guangdong Province (28)                | 0.035                   | 100                |
| East Asia                 | China Guangxi Region Maonan (29)             | 0.148                   | 108                |
| East Asia                 | China Guizhou Province Bouyei (30)           | 0.155                   | 109                |
| East Asia                 | China Guizhou Province Miao pop 2 (30)       | 0.042                   | 85                 |
| East Asia                 | China Guizhou Province Shui (30)             | 0.156                   | 153                |
| East Asia                 | China Inner Mongolia Region (31)             | 0.015                   | 102                |
| East Asia                 | China North Han (32)                         | 0.019                   | 105                |
| East Asia                 | China Qinghai Province Hui (31)              | 0.027                   | 110                |
| East Asia                 | China Southwest Dai (25)                     | 0.069                   | 124                |
| East Asia                 | China Yunnan Province Bulang(33)             | 0.358                   | 116                |
| East Asia                 | China Yunnan Province Han (34)               | 0.124                   | 101                |
| East Asia                 | China Yunnan Province Hani pop 2 (33)        | 0.1                     | 150                |
| East Asia                 | China Yunnan Province Jinuo (35)             | 0.238                   | 109                |

|                    |                                      |        |        |
|--------------------|--------------------------------------|--------|--------|
| East Asia          | China Yunnan Province Lisu (36)      | 0.123  | 111    |
| East Asia          | China Yunnan Province Nu (36)        | 0.09   | 107    |
| East Asia          | China Yunnan Province Wa (35)        | 0.21   | 119    |
| East Asia          | Japan Central (37)                   | 0.001  | 371    |
| East Asia          | Japan pop 3 (38)                     | 0.001  | 1,018  |
| East Asia          | Malaysia(39)                         | 0.081  | 75     |
| East Asia          | Singapore Chinese (8, 23)            | 0.057  | 149    |
| East Asia          | South Korea pop 3 (40)               | 0.002  | 485    |
| East Asia          | South Korea pop 8 (41)               | 0.022  | 7,096  |
| East Asia          | Taiwan pop 2 (42)                    | 0.052  | 364    |
| East Asia          | Taiwan pop 3 (43)                    | 0.06   | 212    |
| East Asia          | Taiwan Tzu Chi Cord Blood Bank (44)  | 0.042  | 710    |
| East Asia          | Thailand Northeast pop 2(45)         | 0.084  | 400    |
| Europe             | Cuba Caucasians(8, 23)               | 0      | 70     |
| Europe             | Bulgaria (46)                        | 0      | 55     |
| Europe             | Germany pop 6 (47)                   | 0.0002 | 8,862  |
| Europe             | Ireland Northern (48, 49)            | 0      | 1,000  |
| Europe             | Poland DKMS(50)                      | 0      | 20,653 |
| Middle East        | United Arab Emirates pop 2(51)       | 0.006  | 373    |
| Middle East        | Oman (8, 23)                         | 0      | 118    |
| Oceania            | Indonesia Sundanese and Javanese(52) | 0.107  | 201    |
| South/Central Asia | India Mumbai Marathas(53)            | 0.01   | 72     |
| South/Central Asia | India Mumbai Maratha (53)            | 0.019  | 91     |
| South/Central Asia | India North pop 2 (54)               | 0.01   | 72     |

**Supplemental TableS3.Evidence linking *HLA-B\*15:02* genotype with carbamazepine-induced SJS/TEN.**

| Type of Experimental Model ( <i>in vitro</i> , <i>in vivo</i> preclinical, or clinical) | Major Findings                                                                                                                                                                                                                                                                                                      | References                    | Level of Evidence |
|-----------------------------------------------------------------------------------------|---------------------------------------------------------------------------------------------------------------------------------------------------------------------------------------------------------------------------------------------------------------------------------------------------------------------|-------------------------------|-------------------|
| In vitro                                                                                | PBMCs from Han Chinese carbamazepine-induced SJS/TEN patients, all <i>HLA B*15:02</i> positive, have significantly higher levels of interferon gamma and granulysin when cultured with carbamazepine, compared to carbamazepine-tolerant patients (2 <i>HLA-B*15:02</i> positive and 9 <i>HLA-B*15:02</i> negative) | <i>Koet et al.</i> 2011(55)   | Moderate          |
| In vitro                                                                                | Patients with carbamazepine-induced SJS/TEN and <i>HLA B*15:02</i> positive mounted a cytotoxic T lymphocyte response. This response was absent in carbamazepine-tolerant <i>HLA B*15:02</i> positive patients                                                                                                      | <i>Weiet et al.</i> 2012 (56) | Moderate          |
| Clinical                                                                                | Prospective screening of <i>HLA-B*15:02</i> reduces the incidence of clinical diagnosed SJS/TEN compared to historical data in a Han Chinese population                                                                                                                                                             | <i>Chen et al.</i> 2011(57)   | High              |

|          |                                                                                                                                                                                                                                     |                                                                                                                                                                           |      |
|----------|-------------------------------------------------------------------------------------------------------------------------------------------------------------------------------------------------------------------------------------|---------------------------------------------------------------------------------------------------------------------------------------------------------------------------|------|
| Clinical | Significant association between <i>HLA-B*15:02</i> genotype and Han Chinese patients with carbamazepine-induced SJS/TEN compared to carbamazepine tolerant patients and/or healthy controls                                         | Chung <i>et al.</i> 2004(58), Hung <i>et al.</i> 2006(5), Man <i>et al.</i> 2007(59), Wang <i>et al.</i> 2011(60), Zhanget <i>al.</i> 2011(61), Linet <i>al.</i> 2012(62) | High |
| Clinical | Significant association between <i>HLA-B*15:02</i> genotype and Malay patients with carbamazepine-induced SJS/TEN compared to healthy controls                                                                                      | Changet <i>al.</i> 2011(63), Thenet <i>al.</i> 2011(64)                                                                                                                   | High |
| Clinical | Significant association between <i>HLA-B*15:02</i> genotype and Thai patients with carbamazepine-induced SJS/TEN compared to carbamazepine-tolerant patients                                                                        | Kulkantrakornet <i>al.</i> 2012(65), Locharernkulet <i>al.</i> 2008(10), Tassaneeyakulet <i>al.</i> 2010(66)                                                              | High |
| Clinical | No significant association between <i>HLA-B*15:02</i> genotype and Japanese patients with carbamazepine-induced SJS/TEN compared to carbamazepine-tolerant patients                                                                 | Ikedaet <i>al.</i> 2010(67), Kaniwaet <i>al.</i> 2008(68), Kaniwaet <i>al.</i> 2010(69), Kano <i>et al.</i> 2008(70)                                                      | High |
| Clinical | No significant association between <i>HLA-B*15:02</i> genotype and Han Chinese patients with carbamazepine- induced non-SJS/TEN cutaneous adverse drug reaction compared to carbamazepine-tolerant patients and/or healthy controls | Hunget <i>al.</i> 2006(5), Manet <i>al.</i> 2007(59), Wang <i>et al.</i> 2011(60)                                                                                         | High |

|          |                                                                                                                                                                                                          |                                                              |          |
|----------|----------------------------------------------------------------------------------------------------------------------------------------------------------------------------------------------------------|--------------------------------------------------------------|----------|
| Clinical | No significant association between <i>HLA-B*15:02</i> genotype and Japanese patients with carbamazepine-induced non-SJS/TEN cutaneous adverse drug reaction compared to carbamazepine-tolerant patients  | Ikeda <i>et al.</i> 2010(67),<br>Kano <i>et al.</i> 2008(70) | High     |
| Clinical | Significant association between <i>HLA-B*15:02</i> genotype and Central Chinese patients with carbamazepine-induced SJS/TEN compared to carbamazepine-tolerant patients and healthy controls             | Wu <i>et al.</i> 2010(71)                                    | Moderate |
| Clinical | Significant association between <i>HLA-B*15:02</i> genotype and Indian patients with carbamazepine-induced SJS/TEN compared to healthy controls                                                          | Mehta <i>et al.</i> 2009(72)                                 | Moderate |
| Clinical | No significant association between <i>HLA-B*15:02</i> genotype and Korean patients with carbamazepine-induced SJS/TEN compared to carbamazepine-tolerant patients                                        | Kim <i>et al.</i> 2011(4)                                    | Moderate |
| Clinical | No significant association between <i>HLA-B*15:02</i> genotype and Caucasian patients with carbamazepine-induced non-SJS/TEN cutaneous adverse drug reaction compared to carbamazepine-tolerant patients | Alfirevic <i>et al.</i> 2006(73)                             | Moderate |

|          |                                                                                                                                                                                                                                        |                                                                                                        |          |
|----------|----------------------------------------------------------------------------------------------------------------------------------------------------------------------------------------------------------------------------------------|--------------------------------------------------------------------------------------------------------|----------|
| Clinical | No significant association between <i>HLA-B*15:02</i> genotype and Central Chinese patients with carbamazepine-induced non-SJS/TEN cutaneous adverse drug reaction compared to carbamazepine-tolerant patients and/or healthy controls | Wu <i>et al.</i> 2010(71)                                                                              | Moderate |
| Clinical | No significant association between <i>HLA-B*15:02</i> genotype and Thai patients with carbamazepine-induced non-SJS/TEN cutaneous adverse drug reaction compared to carbamazepine-tolerant patients and healthy controls               | Locharernkulet <i>al.</i> 2008(10)                                                                     | Moderate |
| Clinical | No significant association between <i>HLA-B*15:02</i> genotype and Caucasian patients with carbamazepine-induced SJS/TEN compared to carbamazepine-tolerant patients                                                                   | Alfirevic <i>et al.</i> 2006(73)                                                                       | Moderate |
| Clinical | Case report of 12 patients (8 Caucasians and 4 Asian ancestry) with carbamazepine-induced SJS/TEN. Only the 4 with Asian ancestry had <i>HLA B*15:02</i> genotype                                                                      | Lonjouet <i>al.</i> 2006(74)                                                                           | Moderate |
| Clinical | Case reports of Asian patient with carbamazepine-induced SJS/TEN and <i>HLA B*15:02</i> genotype                                                                                                                                       | Elzagallaai <i>et al.</i> 2011(75),<br>Odueyungboet <i>al.</i> 2010(76)<br>Wang <i>et al.</i> 2012(77) | Moderate |

SJS: Stevens-Johnson Syndrome; TEN: Toxic Epidermal Necrolysis



HLA-B Reference ATGCTGGTCATGGCGCCCCGAACCGTCTCTCCTGCTGCTCTCGGCGGCCCTGGCCCTGACCGAGACCTGGGCGGGCTCCCACTCCATGAGGTATTTCTACA  
HLA-B\*1502 ATGC**GGGTCA**CGGCGCCCCGAACCGTCTCTCCTGCTGCTCTCGG**GA**GCCCTGGCCCTGACCGAGACCTGGGCGGGCTCCCACTCCATGAGGTATTTCTACA

HLA-B Reference CCTCCGTGTCCCGGCCCGGCCGCGGGGAGCCCCGCTTCATCTCAGTGGGCTACGTGGACGACACCCAGTTTCGTGAGGTTTCGACAGCGACGCCGCGAGTCC  
HLA-B\*1502 CC**GCC**ATGTCCCGGCCCGGCCGCGGGGAGCCCCGCTTCATC**G**CAGTGGGCTACGTGGACGACACCCAGTTTCGTGAGGTTTCGACAGCGACGCCGCGAGTCC

HLA-B Reference GAGAGAGGAGCCGCGGGCGCCGTGGATAGAGCAGGAGGGGCGGAGTATTGGGACCGGAACACACAGATCTACAAGGCCAGGCACAGACTGACCGAGAG  
HLA-B\*1502 GAG**GAT**GG**CGCC**CCGGGCGCC**A**TGGATAGAGCAGGAGGGGCGGAGTATTGGGACCGGAACACACAGATCT**CCAAGACCACA**CACAGACT**T**ACCGAGAG

HLA-B Reference AGCCTGCGGAACCTGCGCGGCTACTACAACCAGAGCGAGGCCGGGTCTCACACCCTCCAGAGCATGTACGGCTGCGACGTGGGGCCGGACGGGCGCCTCC  
HLA-B\*1502 AGCCTGCGGAACCTGCGCGGCTACTACAACCAGAGCGAGGCCGGGTCTCACAT**TC**ATCCAGAG**GAT**GTAT**T**GGCTGCGACGTGGGGCCGGACGGGCGCCTCC

HLA-B Reference TCCGCGGGCATGACCAGTACGCCTACGACGGCAAGGATTACATCGCCCTGAACGAGGACCTGCGCTCCTGGACCGCCGCGGACACGGCGGCTCAGATCAC  
HLA-B\*1502 TCCGCGGG**T**ATGACCAGT**CC**GCCTACGACGGCAAGGATTACATCGCCCTGAACGAGGACCT**GA**GCTCCTGGACCG**CG**CGGACACGGCGGCTCAGATCAC

HLA-B Reference CCAGCGCAAGTGGGAGGCGGCCCGTGAGGCGGAGCAGCGGAGAGCCTACCTGGAGGGCGAGTGCCTGGAGTGGCTCCGCAGATACCTGGAGAACGGGAAG  
HLA-B\*1502 CCAGCGCAAGTGGGAGGCGGCCCGTGAGGCGGAGCAGCT**T**GAGAGCCTACCTGGAGGGC**CT**TGCTGCCTGGAGTGGCTCCGCAGATACCTGGAGAACGGGAAG

HLA-B Reference GACAAGCTGGAGCGCGCTGACCCCCCAAAGACACACGTGACCCACCACCCCATCTCTGACCATGAGGCCACCCTGAGGTGCTGGGCCCTGGGTTTCTACC  
HLA-B\*1502 GAG**AC**GCT**G**CAGCGCG**G**GACCCCCCAAAGACACAT**T**GTGACCCACCACCCCATCTCTGACCATGAGGCCACCCTGAGGTGCTGGGCCCTGGG**CT**TCTACC

HLA-B Reference CTGCGGAGATCACACTGACCTGGCAGCGGGATGGCGAGGACCAAACCTCAGGACACTGAGCTTGTGGAGACCAGACCAGCAGGAGATAGAACCTTCCAGAA  
HLA-B\*1502 CTGCGGAGATCACACTGACCTGGCAGCGGGATGGCGAGGACCAAACCTCAGGACAC**C**GAGCTTGTGGAGACCAGACCAGCAGGAGATAGAACCTTCCAGAA

HLA-B Reference GTGGGCAGCTGTGGTGGTGCCTTCTGGAGAAGAGCAGAGATACACATGCCATGTACAGCATGAGGGGCTGCCGAAGCCCCTCACCTGAGATGGGAGCCG  
HLA-B\*1502 GTGGGCAGCTGTGGTGGTGCCTTCTGGAGAAGAGCAGAGATACACATGCCATGTACAGCATGAGGGGCTGCCGAAGCCCCTCACCTGAGATGGGAGCC**A**

HLA-B Reference TCTTCCCAGTCCACCGTCCCCATCGTGGGCATTGTTGCTGGCCTGGCTGTCTTAGCAGTTGTGGTCATCGGAGCTGTGGTCGCTGCTGTGATGTGTAGGA  
HLA-B\*1502 TCTTCCCAGTCCACC**A**TCCCCATCGTGGGCATTGTTGCTGGCCTGGCTGTCTTAGCAGTTGTGGTCATCGGAGCTGTGGTCGCT**A**CTGTGATGTGTAGGA

HLA-B Reference GGAAGAGTTCAGGTGGAAAAGGAGGGAGCTACTCTCAGGCTGCGTGACGACAGTGCCCAGGGCTCTGATGTGTCTCTCACAGCTTGA  
HLA-B\*1502 GGAAGAG**C**TAGGTGGAAAAGGAGGGAGCTACTCTCAGGCTGCGT**C**CAGCGACAGTGCCCAGGGCTCTGATGTGTCTCTCACAGCTTGA

**Supplemental Figure S1. Nucleotide coding sequence alignment of HLA-B\*15:02 and the reference sequence.** Nucleotide differences between the two sequences are highlighted in blue. This alignment was generated using the IMGT/HLA Database's alignment tool ([www.ebi.ac.uk/imgt/hla/align.html](http://www.ebi.ac.uk/imgt/hla/align.html)) and visualized in Jalview.(78)

HLA-B Reference MLVMAPRTVLLLLLSAALALTETWAGSHSMRYFYTSVSRPGRGEPFRFISVG  
HLA-B\*1502 MRVTAPRTVLLLLLSGALALTETWAGSHSMRYFYTAMSRPGRGEPFRFIAVG

HLA-B Reference YVDDTQFVRFSDAASPREEPRAPWIEQEGPEYWRNTQIYKAQAQTDRE  
HLA-B\*1502 YVDDTQFVRFSDAASPRMAPRAPWIEQEGPEYWRNTQISKTNQTRE

HLA-B Reference SLRNLRGYYNQSEAGSHTLQSMYGCDVGPDRLLRGHDQYAYDGKDYIAL  
HLA-B\*1502 SLRNLRGYYNQSEAGSHIIQRMYGCDVGPDRLLRGYDQSAYDGKDYIAL

HLA-B Reference NEDLRSWTAADTAAQITQRKWEAAREAEQRRAYLEGECEVWLRRLRYLENGK  
HLA-B\*1502 NEDLSSWTAADTAAQITQRKWEAAREAEQLRAYLEGLCEVWLRRLRYLENGK

HLA-B Reference DKLERADPPKTHVTHHPISDHEATLRCWALGFYPAEITLTWQRDGEDQTQ  
HLA-B\*1502 ETLQRADPPKTHVTHHPISDHEATLRCWALGFYPAEITLTWQRDGEDQTQ

HLA-B Reference DTELVETRPAGDRTFQKWAAVVVPSEEGQRYTCHVQHEGLPKPLTLRWEP  
HLA-B\*1502 DTELVETRPAGDRTFQKWAAVVVPSEEGQRYTCHVQHEGLPKPLTLRWEP

HLA-B Reference SSQSTVPIVGIVAGLAVLAVVIGAVVAVMCRKSSGGKGGSYSQAACS  
HLA-B\*1502 SSQSTIPIVGIVAGLAVLAVVIGAVVATVMCRKSSGGKGGSYSQAASS

HLA-B Reference DSAQGSVDVSLTA  
HLA-B\*1502 DSAQGSVDVSLTA

**Supplemental Figure S2. Amino acid sequence alignment of HLA-B\*15:02 and the reference sequence.** Amino acid differences between the two sequences are highlighted in blue. This alignment was generated using the IMGT/HLA Database's alignment tool ([www.ebi.ac.uk/imgt/hla/align.html](http://www.ebi.ac.uk/imgt/hla/align.html)) and visualized in Jalview.(78)

## References

- (1) Niihara, H., Kakamu, T., Fujita, Y., Kaneko, S. & Morita, E. HLA-A31 strongly associates with carbamazepine-induced adverse drug reactions but not with carbamazepine-induced lymphocyte proliferation in a Japanese population. *The Journal of dermatology***39**, 594-601 (2012).
- (2) Yip, V.L., Marson, A.G., Jorgensen, A.L., Pirmohamed, M. & Alfirevic, A. HLA Genotype and Carbamazepine-Induced Cutaneous Adverse Drug Reactions: A Systematic Review. *Clin Pharmacol Ther***92**, 757-65 (2012).
- (3) McCormack, M. *et al.* HLA-A\*3101 and carbamazepine-induced hypersensitivity reactions in Europeans. *N Engl J Med***364**, 1134-43 (2011).
- (4) Kim, S.H. *et al.* Carbamazepine-induced severe cutaneous adverse reactions and HLA genotypes in Koreans. *Epilepsy Res***97**, 190-7 (2011).
- (5) Hung, S.I. *et al.* Genetic susceptibility to carbamazepine-induced cutaneous adverse drug reactions. *Pharmacogenet Genomics***16**, 297-306 (2006).
- (6) Kashiwagi, M. *et al.* Human leukocyte antigen genotypes in carbamazepine-induced severe cutaneous adverse drug response in Japanese patients. *The Journal of dermatology***35**, 683-5 (2008).
- (7) Ozeki, T. *et al.* Genome-wide association study identifies HLA-A\*3101 allele as a genetic risk factor for carbamazepine-induced cutaneous adverse drug reactions in Japanese population. *Hum Mol Genet***20**, 1034-41 (2011).
- (8) Middleton, D. *et al.* Analysis of the distribution of HLA-A alleles in populations from five continents. *Hum Immunol***61**, 1048-52 (2000).
- (9) Min, F.L., Shi, Y.W., Liu, X.R. & Liao, W.P. HLA-B\*1502 genotyping in two Chinese patients with phenytoin-induced Stevens-Johnson syndrome. *Epilepsy Behav***20**, 390-1 (2011).
- (10) Locharernkul, C. *et al.* Carbamazepine and phenytoin induced Stevens-Johnson syndrome is associated with HLA-B\*1502 allele in Thai population. *Epilepsia***49**, 2087-91 (2008).
- (11) Hung, S.I. *et al.* Common risk allele in aromatic antiepileptic-drug induced Stevens-Johnson syndrome and toxic epidermal necrolysis in Han Chinese. *Pharmacogenomics***11**, 349-56 (2010).
- (12) Lin, L.C., Lai, P.C., Yang, S.F. & Yang, R.C. Oxcarbazepine-induced Stevens-Johnson syndrome: a case report. *Kaohsiung J Med Sci***25**, 82-6 (2009).
- (13) Shankarkumar, U., Shah, K.N. & Ghosh, K. Letter: HLA B\*1502 allele association with oxcarbazepine-induced skin reactions in epilepsy patient from India. *Epilepsia***50**, 1837-8 (2009).
- (14) Chen, Y.C., Chu, C.Y. & Hsiao, C.H. Oxcarbazepine-induced Stevens-Johnson syndrome in a patient with HLA-B\*1502 genotype. *J Eur Acad Dermatol Venereol***23**, 702-3 (2009).
- (15) Hu, F.Y., Wu, X.T., An, D.M., Yan, B., Stefan, H. & Zhou, D. Pilot association study of oxcarbazepine-induced mild cutaneous adverse reactions with HLA-B\*1502 allele in Chinese Han population. *Seizure***20**, 160-2 (2011).
- (16) An, D.M., Wu, X.T., Hu, F.Y., Yan, B., Stefan, H. & Zhou, D. Association study of lamotrigine-induced cutaneous adverse reactions and HLA-B\*1502 in a Han Chinese population. *Epilepsy Research***92**, 226-30 (2010).
- (17) Shi, Y.W. *et al.* Hla-B alleles and lamotrigine-induced cutaneous adverse drug reactions in the Han Chinese population. *Basic Clin Pharmacol Toxicol***109**, 42-6 (2011).
- (18) Valdes, R., Payne, D.A. & Linder, M.W. Laboratory analysis and application of pharmacogenetics to clinical practice. *The National Academy of Clinical Biochemistry (NACB) - Laboratory Medicine Practice Guidelines* 2010.
- (19) Relling, M.V. & Klein, T.E. CPIC: Clinical Pharmacogenetics Implementation Consortium of the Pharmacogenomics Research Network. *Clin Pharmacol Ther***89**, 464-7 (2011).

- (20) Panel on Antiretroviral Guidelines for Adults and Adolescents. Guidelines for the use of antiretroviral agents in HIV-1-infected adults and adolescents. Department of Health and Human Services. 1-166 (2012).
- (21) Piancatelli, D. *et al.* Human leukocyte antigen-A, -B, and -Cw polymorphism in a Berber population from North Morocco using sequence-based typing. *Tissue Antigens***63**, 158-72 (2004).
- (22) Canossi, A. *et al.* Correlation between genetic HLA class I and II polymorphisms and anthropological aspects in the Chaouya population from Morocco (Arabic speaking). *Tissue Antigens***76**, 177-93 (2010).
- (23) Williams, F. *et al.* Analysis of the distribution of HLA-B alleles in populations from five continents. *Hum Immunol***62**, 645-50 (2001).
- (24) Barquera, R. *et al.* HLA class I and class II haplotypes in admixed families from several regions of Mexico. *Mol Immunol***45**, 1171-8 (2008).
- (25) Liang, Y. *et al.* Targeted agents for chronic myelogenous leukemia: will that be the end of allogeneic bone marrow transplantation for that disease? *Biol Blood Marrow Transplant***16**, 848-53 (2010).
- (26) Yang, G. *et al.* HLA-A, -B, and -DRB1 polymorphism defined by sequence-based typing of the Han population in Northern China. *Tissue Antigens***67**, 146-52 (2006).
- (27) Trachtenberg, E. *et al.* HLA class I (A, B, C) and class II (DRB1, DQA1, DQB1, DPB1) alleles and haplotypes in the Han from southern China. *Tissue Antigens***70**, 455-63 (2007).
- (28) Chen, S., Li, W., Hu, Q., Liu, Z., Xu, Y. & Xu, A. Polymorphism of HLA class I genes in Meizhou Han population of Guangdong, China. *Int J Immunogenet***34**, 131-6 (2007).
- (29) Ogata, S. *et al.* Polymorphisms of human leukocyte antigen genes in Maonan people in China. *Tissue Antigens***69**, 154-60 (2007).
- (30) Chen, S., Ren, X., Liu, Y., Hu, Q., Hong, W. & Xu, A. Human leukocyte antigen class I polymorphism in Miao, Bouyei, and Shui ethnic minorities of Guizhou, China. *Hum Immunol***68**, 928-33 (2007).
- (31) Hong, W., Chen, S., Shao, H., Fu, Y., Hu, Z. & Xu, A. HLA class I polymorphism in Mongolian and Hui ethnic groups from Northern China. *Hum Immunol***68**, 439-48 (2007).
- (32) Hong, W., Fu, Y., Chen, S., Wang, F., Ren, X. & Xu, A. Distributions of HLA class I alleles and haplotypes in Northern Han Chinese. *Tissue Antigens***66**, 297-304 (2005).
- (33) Shi, L. *et al.* Genetic link among Hani, Bulang and other Southeast Asian populations: evidence from HLA -A, -B, -C, -DRB1 genes and haplotypes distribution. *Int J Immunogenet***37**, 467-75 (2010).
- (34) Yao, Y. *et al.* Distribution of HLA-A, -B, -Cw, and -DRB1 alleles and haplotypes in an isolated Han population in Southwest China. *Tissue Antigens***73**, 561-8 (2009).
- (35) Shi, L. *et al.* Distribution of HLA alleles and haplotypes in Jinuo and Wa populations in Southwest China. *Hum Immunol***69**, 58-65 (2008).
- (36) Chen, S. *et al.* Origin of Tibeto-Burman speakers: evidence from HLA allele distribution in Lisu and Nu inhabiting Yunnan of China. *Hum Immunol***68**, 550-9 (2007).
- (37) Saito, S., Ota, S., Yamada, E., Inoko, H. & Ota, M. Allele frequencies and haplotypic associations defined by allelic DNA typing at HLA class I and class II loci in the Japanese population. *Tissue Antigens***56**, 522-9 (2000).
- (38) Itoh, Y. *et al.* High-throughput DNA typing of HLA-A, -B, -C, and -DRB1 loci by a PCR-SSOP-Luminex method in the Japanese population. *Immunogenetics***57**, 717-29 (2005).
- (39) Jinam, T.A., Saitou, N., Edo, J., Mahmood, A. & Phipps, M.E. Molecular analysis of HLA Class I and Class II genes in four indigenous Malaysian populations. *Tissue Antigens***75**, 151-8 (2010).
- (40) Lee, K.W., Oh, D.H., Lee, C. & Yang, S.Y. Allelic and haplotypic diversity of HLA-A, -B, -C, -DRB1, and -DQB1 genes in the Korean population. *Tissue Antigens***65**, 437-47 (2005).

- (41) Yoon, J.H., Shin, S., Park, M.H., Song, E.Y. & Roh, E.Y. HLA-A, -B, -DRB1 allele frequencies and haplotypic association from DNA typing data of 7096 Korean cord blood units. *Tissue Antigens***75**, 170-3 (2010).
- (42) Yang, K.L., Chen, S.P., Shyr, M.H. & Lin, P.Y. High-resolution human leukocyte antigen (HLA) haplotypes and linkage disequilibrium of HLA-B and -C and HLA-DRB1 and -DQB1 alleles in a Taiwanese population. *Hum Immunol***70**, 269-76 (2009).
- (43) Yu, K.J. *et al.* Association of human leukocyte antigens with nasopharyngeal carcinoma in high-risk multiplex families in Taiwan. *Hum Immunol***70**, 910-4 (2009).
- (44) Wen, S.H., Lai, M.J. & Yang, K.L. Human leukocyte antigen-A, -B, and -DRB1 haplotypes of cord blood units in the Tzu Chi Taiwan Cord Blood Bank. *Hum Immunol***69**, 430-6 (2008).
- (45) Romphruk, A.V., Romphruk, A., Kongmaroeng, C., Klumkrathok, K., Paupairoj, C. & Leelayuwat, C. HLA class I and II alleles and haplotypes in ethnic Northeast Thais. *Tissue Antigens***75**, 701-11 (2010).
- (46) Ivanova, M., Rozemuller, E., Tyufekchiev, N., Michailova, A., Tilanus, M. & Naumova, E. HLA polymorphism in Bulgarians defined by high-resolution typing methods in comparison with other populations. *Tissue Antigens***60**, 496-504 (2002).
- (47) Schmidt, A.H. *et al.* Estimation of high-resolution HLA-A, -B, -C, -DRB1 allele and haplotype frequencies based on 8862 German stem cell donors and implications for strategic donor registry planning. *Hum Immunol***70**, 895-902 (2009).
- (48) Williams, F., Meenagh, A., Maxwell, A.P. & Middleton, D. Allele resolution of HLA-A using oligonucleotide probes in a two-stage typing strategy. *Tissue Antigens***54**, 59-68 (1999).
- (49) Middleton, D., Williams, F., Hamill, M.A. & Meenagh, A. Frequency of HLA-B alleles in a Caucasoid population determined by a two-stage PCR-SSOP typing strategy. *Hum Immunol***61**, 1285-97 (2000).
- (50) Schmidt, A.H. *et al.* High-resolution human leukocyte antigen allele and haplotype frequencies of the Polish population based on 20,653 stem cell donors. *Hum Immunol***72**, 558-65 (2011).
- (51) Valluri, V. *et al.* Frequencies of HLA-A, HLA-B, HLA-DR, and HLA-DQ phenotypes in the United Arab Emirates population. *Tissue Antigens***66**, 107-13 (2005).
- (52) Yuliwulandari, R. *et al.* Polymorphisms of HLA genes in Western Javanese (Indonesia): close affinities to Southeast Asian populations. *Tissue Antigens***73**, 46-53 (2009).
- (53) Shankarkumar, U., Pawar, A., Ghosh, K., Bajpai, S. & Pazare, A. Human leucocyte antigen class II DRB1 and DQB1 associations in human immunodeficiency virus-infected patients of Mumbai, India. *Int J Immunogenet***37**, 199-204 (2010).
- (54) Rajalingam, R. *et al.* Distinctive KIR and HLA diversity in a panel of north Indian Hindus. *Immunogenetics***53**, 1009-19 (2002).
- (55) Ko, T.M. *et al.* Shared and restricted T-cell receptor use is crucial for carbamazepine-induced Stevens-Johnson syndrome. *J Allergy Clin Immunol***128**, 1266-76 e11 (2011).
- (56) Wei, C.Y., Chung, W.H., Huang, H.W., Chen, Y.T. & Hung, S.I. Direct interaction between HLA-B and carbamazepine activates T cells in patients with Stevens-Johnson syndrome. *J Allergy Clin Immunol***129**, 1562-9 e5 (2012).
- (57) Chen, P. *et al.* Carbamazepine-induced toxic effects and HLA-B\*1502 screening in Taiwan. *N Engl J Med***364**, 1126-33 (2011).
- (58) Chung, W.H. *et al.* Medical genetics: a marker for Stevens-Johnson syndrome. *Nature***428**, 486 (2004).
- (59) Man, C.B. *et al.* Association between HLA-B\*1502 allele and antiepileptic drug-induced cutaneous reactions in Han Chinese. *Epilepsia***48**, 1015-8 (2007).
- (60) Wang, Q. *et al.* Association between HLA-B\*1502 allele and carbamazepine-induced severe cutaneous adverse reactions in Han people of southern China mainland. *Seizure***20**, 446-8 (2011).

- (61) Zhang, Y. *et al.* Strong association between HLA-B\*1502 and carbamazepine-induced Stevens-Johnson syndrome and toxic epidermal necrolysis in mainland Han Chinese patients. *Eur J Clin Pharmacol***67**, 885-7 (2011).
- (62) Lin, Y.T. *et al.* A patch testing and cross-sensitivity study of carbamazepine-induced severe cutaneous adverse drug reactions. *J Eur Acad Dermatol Venereol*, (2012).
- (63) Chang, C.C., Too, C.L., Murad, S. & Hussein, S.H. Association of HLA-B\*1502 allele with carbamazepine-induced toxic epidermal necrolysis and Stevens-Johnson syndrome in the multi-ethnic Malaysian population. *Int J Dermatol***50**, 221-4 (2011).
- (64) Then, S.M., Rani, Z.Z., Raymond, A.A., Ratnaningrum, S. & Jamal, R. Frequency of the HLA-B\*1502 allele contributing to carbamazepine-induced hypersensitivity reactions in a cohort of Malaysian epilepsy patients. *Asian Pac J Allergy Immunol***29**, 290-3 (2011).
- (65) Kulkantrakorn, K. *et al.* HLA-B\*1502 strongly predicts carbamazepine-induced Stevens-Johnson syndrome and toxic epidermal necrolysis in Thai patients with neuropathic pain. *Pain Pract***12**, 202-8 (2012).
- (66) Tassaneeyakul, W. *et al.* Association between HLA-B\*1502 and carbamazepine-induced severe cutaneous adverse drug reactions in a Thai population. *Epilepsia***51**, 926-30 (2010).
- (67) Ikeda, H. *et al.* HLA class I markers in Japanese patients with carbamazepine-induced cutaneous adverse reactions. *Epilepsia***51**, 297-300 (2010).
- (68) Kaniwa, N. *et al.* HLA-B locus in Japanese patients with anti-epileptics and allopurinol-related Stevens-Johnson syndrome and toxic epidermal necrolysis. *Pharmacogenomics***9**, 1617-22 (2008).
- (69) Kaniwa, N. *et al.* HLA-B\*1511 is a risk factor for carbamazepine-induced Stevens-Johnson syndrome and toxic epidermal necrolysis in Japanese patients. *Epilepsia***51**, 2461-5 (2010).
- (70) Kano, Y., Hirahara, K., Asano, Y. & Shiohara, T. HLA-B allele associations with certain drugs are not confirmed in Japanese patients with severe cutaneous drug reactions. *Acta Derm Venereol***88**, 616-8 (2008).
- (71) Wu, X.T. *et al.* Association between carbamazepine-induced cutaneous adverse drug reactions and the HLA-B\*1502 allele among patients in central China. *Epilepsy Behav***19**, 405-8 (2010).
- (72) Mehta, T.Y. *et al.* Association of HLA-B\*1502 allele and carbamazepine-induced Stevens-Johnson syndrome among Indians. *Indian J Dermatol Venereol Leprol***75**, 579-82 (2009).
- (73) Alfirevic, A., Jorgensen, A.L., Williamson, P.R., Chadwick, D.W., Park, B.K. & Pirmohamed, M. HLA-B locus in Caucasian patients with carbamazepine hypersensitivity. *Pharmacogenomics***7**, 813-8 (2006).
- (74) Lonjou, C. *et al.* A marker for Stevens-Johnson syndrome ...: ethnicity matters. *Pharmacogenomics***6**, 265-8 (2006).
- (75) Elzagallaai, A.A., Garcia-Bournissen, F., Finkelstein, Y., Bend, J.R., Rieder, M.J. & Koren, G. Severe bullous hypersensitivity reactions after exposure to carbamazepine in a Han-Chinese child with a positive HLA-B\*1502 and negative in vitro toxicity assays: evidence for different pathophysiological mechanisms. *J Popul Ther Clin Pharmacol***18**, e1-9 (2011).
- (76) Oduyungbo, M.A., Sheehan, M.P. & Haggstrom, A.N. HLA-B\*1502 allele associated with carbamazepine-induced epidermal necrolysis. *Arch Dermatol***146**, 1437-8 (2010).
- (77) Wang, J., Zhang, J., Wu, X., Yu, P. & Hong, Z. HLA-B\*1502 allele is associated with a cross-reactivity pattern of cutaneous adverse reactions to antiepileptic drugs. *The Journal of international medical research***40**, 377-82 (2012).
- (78) Waterhouse, A.M., Procter, J.B., Martin, D.M., Clamp, M. & Barton, G.J. Jalview Version 2--a multiple sequence alignment editor and analysis workbench. *Bioinformatics***25**, 1189-91 (2009).
